# Supplementary material
Source: publisher site journal article supplement (https://www.spandidos-publications.com/2200/downloadSupplementary)

Figure S1. PDIA1 and HLA-G mRNA levels in breast cancer patients. (A and C) PDIA1 and (B and D) HLA-G mRNA levels in (A and B) ER $\alpha$ -positive and (C and D) ER $\alpha$ -negative breast cancer patients at different stages of the disease.

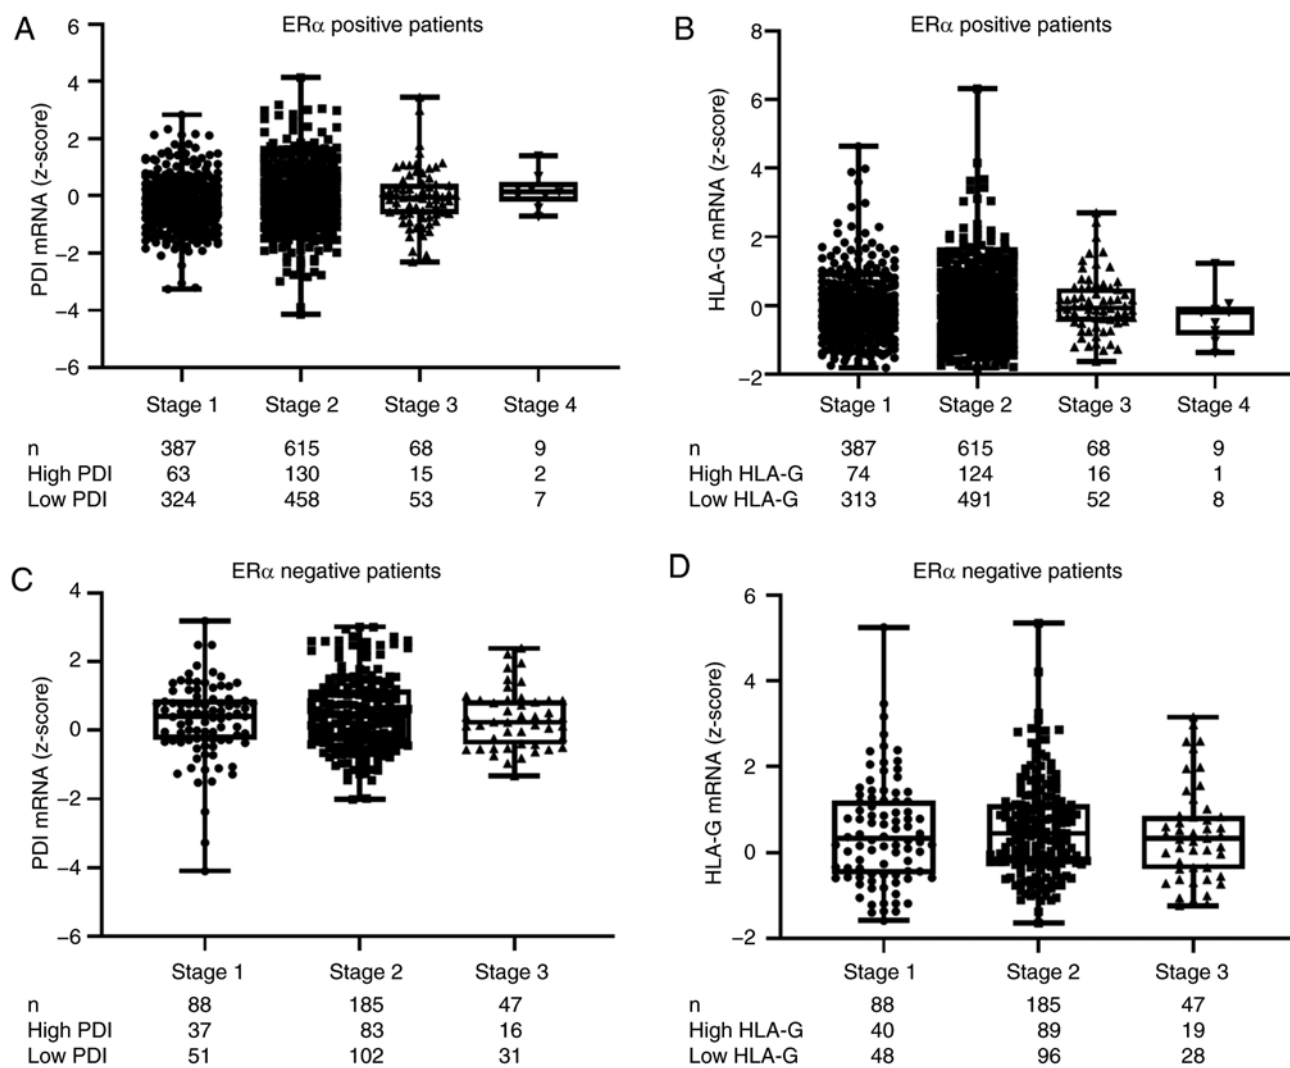

Figure S2. Correlation between PDIA1 and HLA-G mRNA levels in ER $\alpha$  positive and ER $\alpha$  negative breast cancer patients at different stages of the disease. Correlation of the numbers of ER $\alpha$  positive (A, B and C) or ER $\alpha$  negative (D, E and F) breast cancer patients expressing high or low PDIA1 mRNA levels with those of HLA-G mRNA at stage 1 (A and D), stage 2 (B and E) and stage 3 (C and F). \*P<0.05 and \*\*P<0.01.

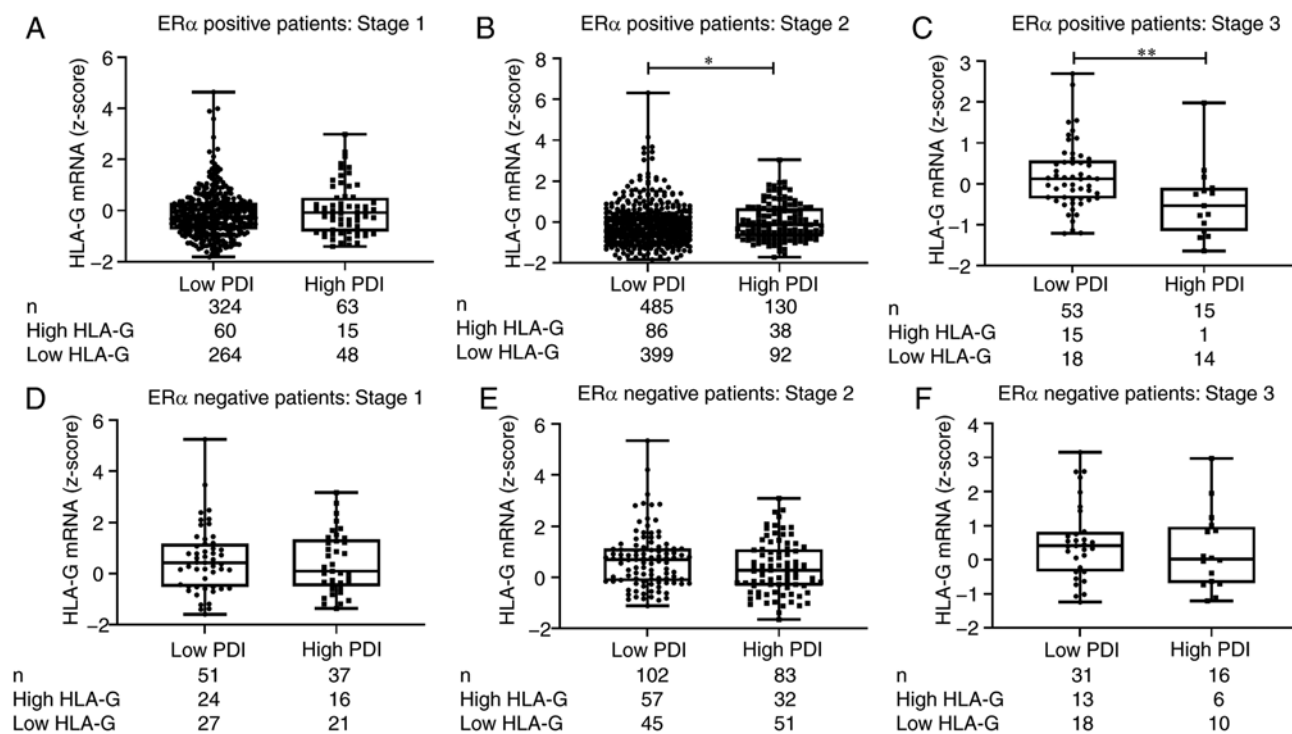

Supplement: Supplementary file 1 [file downloadSupplementary]
